# Supplementary material for: Penetrance of Breast Cancer Susceptibility Genes From the eMERGE III Network
Source: PubMed Central journal article supplement — JNCI Cancer Spectr. 2021 May 8;5(4):pkab044. doi: 10.1093/jncics/pkab044 (PMC8346699; doi:10.1093/jncics/pkab044), 2021-05-08
Supplement: pkab044_supplementary_data.pdf [file pkab044_supplementary_data.pdf]

## Supplementary Material

### Penetrance of Breast Cancer Susceptibility Genes from the eMERGE III Network

Xiao Fan, PhD<sup>1,2</sup>, Julia Wynn, MS<sup>1</sup>, Ning Shang, PhD<sup>3</sup>, Cong Liu, PhD<sup>3</sup>, Alexander Fedotov, PhD<sup>4</sup>, Miranda L.G. Hallquist, MS<sup>14</sup>, Adam H. Buchanan, MS<sup>14</sup>, Marc S. Williams, MD<sup>14</sup>, Maureen E. Smith, MS<sup>5</sup>, Christin Hoell, MS<sup>6</sup>, Laura J. Rasmussen-Torvik, PhD<sup>7</sup>, Josh F. Peterson, MD<sup>8</sup>, Georgia L. Wiesner, MD<sup>9</sup>, Andrea M. Murad, MS<sup>10</sup>, Gail P. Jarvik, MD, PhD<sup>11</sup>, Adam S. Gordon, PhD<sup>6</sup>, Elisabeth A. Rosenthal, PhD<sup>11</sup>, Ian B. Stanaway, PhD<sup>11</sup>, David R. Crosslin, PhD<sup>12</sup>, Eric B. Larson, MD<sup>13</sup>, Kathleen A. Leppig, MD<sup>13</sup>, Nora B. Henrikson, PhD<sup>13</sup>, Janet L. Williams, MS<sup>14</sup>, Rongling Li, PhD<sup>15</sup>, Scott Hebring, PhD<sup>16</sup>, Chunhua Weng, PhD<sup>3</sup>, Yufeng Shen, PhD<sup>2,3</sup>, Katherine D. Crew, MD<sup>17,18</sup>, Wendy K. Chung, MD, PhD<sup>1,17,18\*</sup>

<sup>1</sup> Department of Pediatrics, Columbia University Irving Medical Center, New York, NY 10032

<sup>2</sup> Department of Systems Biology, Columbia University Irving Medical Center, New York, NY 10032

<sup>3</sup> Department of Biomedical Informatics, Columbia University Irving Medical Center, New York, NY 10032

<sup>4</sup> Irving Institute for Clinical and Translational Research, Columbia University Irving Medical Center, New York, NY 10032

<sup>5</sup> Department of Medicine, Northwestern University, Chicago Feinberg School of Medicine, IL 60657

<sup>6</sup> Center for Genetic Medicine, Northwestern University Feinberg School of Medicine, Chicago, IL 60611

<sup>7</sup> Department of Preventive Medicine, Northwestern University Feinberg School of Medicine, Chicago, IL 60611

<sup>8</sup> Department of Biomedical Informatics, Vanderbilt University Medical Center, Nashville TN 37203

<sup>9</sup> Department of Medicine, Vanderbilt University Medical Center, Nashville, TN 37203

<sup>10</sup> Division of Genetic Medicine, Department of Internal Medicine, University of Michigan, Ann Arbor, MI 48109

<sup>11</sup> Department of Medicine (Medical Genetics), University of Washington Medical Center, Seattle, WA, 98105

<sup>12</sup> Department of Biomedical Informatics and Medical Education, University of Washington Medical Center, Seattle, WA, 98105

<sup>13</sup> Kaiser Permanente of Washington, Seattle, WA 98112

<sup>14</sup> Genomic Medicine Institute, Geisinger, Danville, PA 17822

<sup>15</sup> Division of Genomic Medicine, National Human Genome Research Institute, National Institutes of Health, Baltimore, MD 21224

<sup>16</sup> Center for Precision Medicine Research, Marshfield Clinic, Marshfield, WI 54449

<sup>17</sup> Herbert Irving Comprehensive Cancer Center, Columbia University Irving Medical Center, New York, NY 10032

<sup>18</sup> Department of Medicine, Columbia University Irving Medical Center, New York, NY 10032

\* Corresponding author, email: [wkc15@cumc.columbia.edu](mailto:wkc15@cumc.columbia.edu)

**Supplementary Table 1. Clinical characteristics of 24,947 eMERGE III participants.**

| Sex <sup>a</sup>  | Ancestry <sup>b</sup> | Count | Current age (SD), y |
|-------------------|-----------------------|-------|---------------------|
| Female (n=13,458) | African American      | 1758  | 38.6 (23.5)         |
|                   | East Asian            | 952   | 52.3 (14.2)         |
|                   | European American     | 9122  | 54.1 (21.3)         |
|                   | Hispanic              | 960   | 49.5 (18)           |
|                   | South Asian           | 65    | 63.1 (13.9)         |
|                   | unknown               | 601   | 48.8 (23.1)         |
| Male (n=11,498)   | African American      | 1994  | 31.5 (21.8)         |
|                   | East Asian            | 588   | 53.9 (16)           |
|                   | European American     | 7892  | 54.1 (23.8)         |
|                   | Hispanic              | 546   | 46 (20.6)           |
|                   | South Asian           | 34    | 51.3 (20.1)         |
|                   | unknown               | 444   | 41.3 (24.7)         |

<sup>a</sup>Sex was genetically inferred.

<sup>b</sup>Ancestry was self-reported.

**Supplementary Table 2. Recurrent P/LP variants in the breast cancer susceptibility genes, sorted by allele count in the eMERGE penetrance cohort.**

| cDNA                      | Gene         | Function     | ClinVar                                             | Allele count |
|---------------------------|--------------|--------------|-----------------------------------------------------|--------------|
| c.470T>C                  | <i>CHEK2</i> | missense     | Conflicting interpretations of pathogenicity        | 26           |
| c.1100delC                | <i>CHEK2</i> | frameshift   | Conflicting interpretations of pathogenicity        | 7            |
| c.2638+2T>C               | <i>ATM</i>   | splice-donor | Pathogenic/Likely pathogenic by multiple submitters | 4            |
| c.5946del                 | <i>BRCA2</i> | frameshift   | Pathogenic reviewed by expert panel                 | 3            |
| c.1427C>T                 | <i>CHEK2</i> | missense     | Conflicting interpretations of pathogenicity        | 3            |
| c.1283C>T                 | <i>CHEK2</i> | missense     | Conflicting interpretations of pathogenicity        | 3            |
| c.7271T>G                 | <i>ATM</i>   | missense     | Pathogenic/Likely pathogenic by multiple submitters | 2            |
| c.3049C>T                 | <i>ATM</i>   | stop-gain    | Pathogenic by multiple submitters                   | 2            |
| c.4876_4877del<br>AA      | <i>BRCA2</i> | frameshift   | Pathogenic reviewed by expert panel                 | 2            |
| c.5217_5223del<br>TTTAAGT | <i>BRCA2</i> | frameshift   | Pathogenic reviewed by expert panel                 | 2            |
| c.9253dupA                | <i>BRCA2</i> | frameshift   | Pathogenic reviewed by expert panel                 | 2            |
| c.2808_2811del<br>ACAA    | <i>BRCA2</i> | frameshift   | Pathogenic reviewed by expert panel                 | 2            |
| c.7558C>T                 | <i>BRCA2</i> | stop-gain    | Pathogenic reviewed by expert panel                 | 2            |
| c.2257C>T                 | <i>PALB2</i> | stop-gain    | Pathogenic by multiple submitters                   | 2            |

**Supplementary Table 3. Number of carriers and unique P/LP variants for each gene and variant type.**

| Gene                   | missense | splice | stop-gain | frameshift | CNV | ClinVar <sup>a</sup> |
|------------------------|----------|--------|-----------|------------|-----|----------------------|
| No. of carriers        |          |        |           |            |     |                      |
| <i>ATM</i>             | 3        | 6      | 7         | 5          | 0   | 18 (86%)             |
| <i>BRCA1</i>           | 3        | 2      | 4         | 8          | 0   | 15 (88%)             |
| <i>BRCA2</i>           | 0        | 5      | 8         | 26         | 0   | 37 (95%)             |
| <i>CHEK2</i>           | 33       | 2      | 1         | 10         | 2   | 7 (15%)              |
| <i>PALB2</i>           | 0        | 4      | 6         | 5          | 0   | 14 (93%)             |
| <i>PTEN</i>            | 1        | 0      | 1         | 1          | 0   | 3 (100%)             |
| <i>TP53</i>            | 3        | 0      | 2         | 0          | 0   | 4 (80%)              |
| No. of unique variants |          |        |           |            |     |                      |
| <i>ATM</i>             | 2        | 3      | 6         | 5          | 0   | 13 (81%)             |
| <i>BRCA1</i>           | 3        | 2      | 4         | 8          | 0   | 15 (88%)             |
| <i>BRCA2</i>           | 0        | 5      | 7         | 20         | 0   | 30 (94%)             |
| <i>CHEK2</i>           | 4        | 2      | 1         | 4          | 2   | 7 (54%)              |
| <i>PALB2</i>           | 0        | 4      | 5         | 5          | 0   | 13 (93%)             |
| <i>PTEN</i>            | 1        | 0      | 1         | 1          | 0   | 3 (100%)             |
| <i>TP53</i>            | 3        | 0      | 2         | 0          | 0   | 4 (80%)              |

<sup>a</sup> Number of variants with at least 2-star review status in ClinVar is given with percentage in the parentheses. CNV = copy number variation.

**Supplementary Table 4. Prevalence of individuals with two *CHEK2* variants estimated in various European populations<sup>a</sup>**

| Ancestry                  | Prevalence | No. of individuals | Reference           |
|---------------------------|------------|--------------------|---------------------|
| <i>CHEK2</i> :c.470T>C    |            |                    |                     |
| Byelorussian              | 1.3%       | 307                | [1]                 |
| German                    | 0.6%       | 486                | [1]                 |
| German                    | 1.6%       | 500                | [2]                 |
| Polish                    | 4.8%       | 4000               | [3]                 |
| Finnish                   | 4.9%       | 12,551             | gnomAD (non-cancer) |
| non-Finish European       | 1.0%       | 59,069             | gnomAD (non-cancer) |
| European American         | 0.2%       | 17,014             | eMERGE III          |
| <i>CHEK2</i> : c.1100delC |            |                    |                     |
| Byelorussian              | 0.0%       | 307                | [1]                 |
| German                    | 0.2%       | 486                | [1]                 |
| Czech                     | 0.3%       | 730                | [4]                 |
| German                    | 0.5%       | 1315               | [2]                 |
| European                  | 0.6%       | 40063              | [5]                 |
| non-Finish European       | 1.7%       | 12,554             | gnomAD (non-cancer) |
| European American         | 0.5%       | 58,451             | gnomAD (non-cancer) |
| European American         | 0.1%       | 17,014             | eMERGE III          |

<sup>a</sup>The prevalence in gnomAD was calculated based on the allele frequency.

**Supplementary Table 5. Summary of recent penetrance studies that were used to compare with these population-based penetrance estimates for the six breast cancer genes.**

| Genes          | No. of women with P/LP variants | Source of the study populations      | Ancestry         | Reference                    |
|----------------|---------------------------------|--------------------------------------|------------------|------------------------------|
| <i>ATM</i>     | NA                              | Meta case-control studies            | multiple         | Marabelli et al. 2016 [6]    |
| <i>BRCA1/2</i> | 211                             | General population                   | Ashkenazi Jewish | Gabai-Kapara et al. 2014 [7] |
| <i>CHEK2</i>   | 533                             | Cancer clinic                        | European         | Gronwald et al. 2009 [8]     |
| <i>PALB2</i>   | 311                             | Cancer clinic                        | European         | Antoniou et al. 2014 [9]     |
| <i>PTEN</i>    | 368                             | Breast Cancer Association Consortium | Asian            | Han et al. 2017 [10]         |
| <i>TP53</i>    | 189                             | Cancer history                       | multiple         | Mai et al. 2016 [11]         |

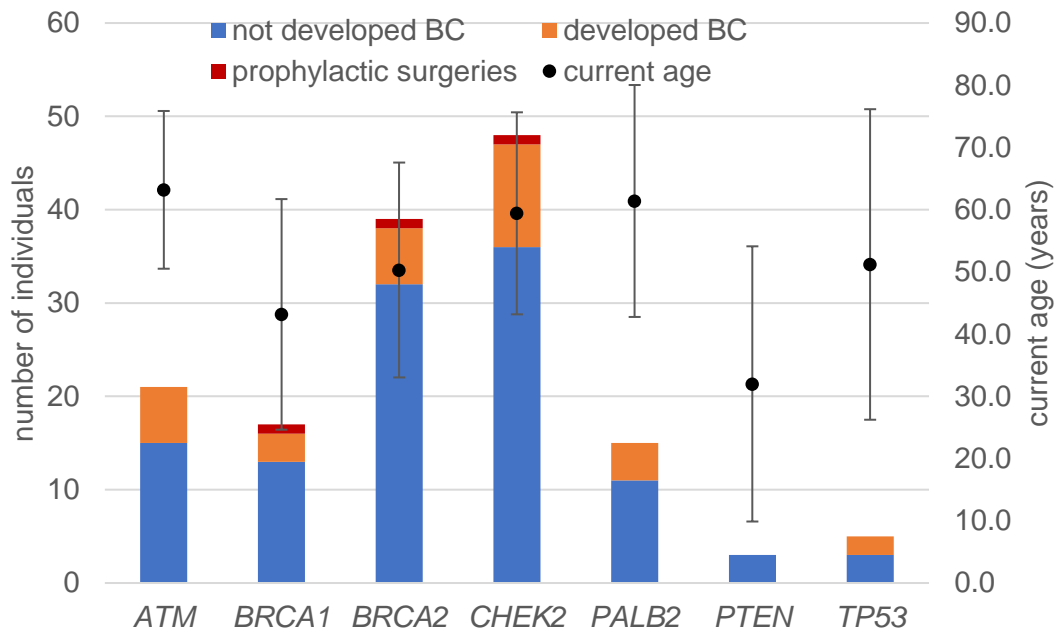

**Supplementary Figure 1. Breast cancer (BC) status by the last review including not developed breast cancer (blue), developed breast cancer (orange) and prophylactic mastectomy (red).** The average age and standard deviation were shown in the secondary y axis.

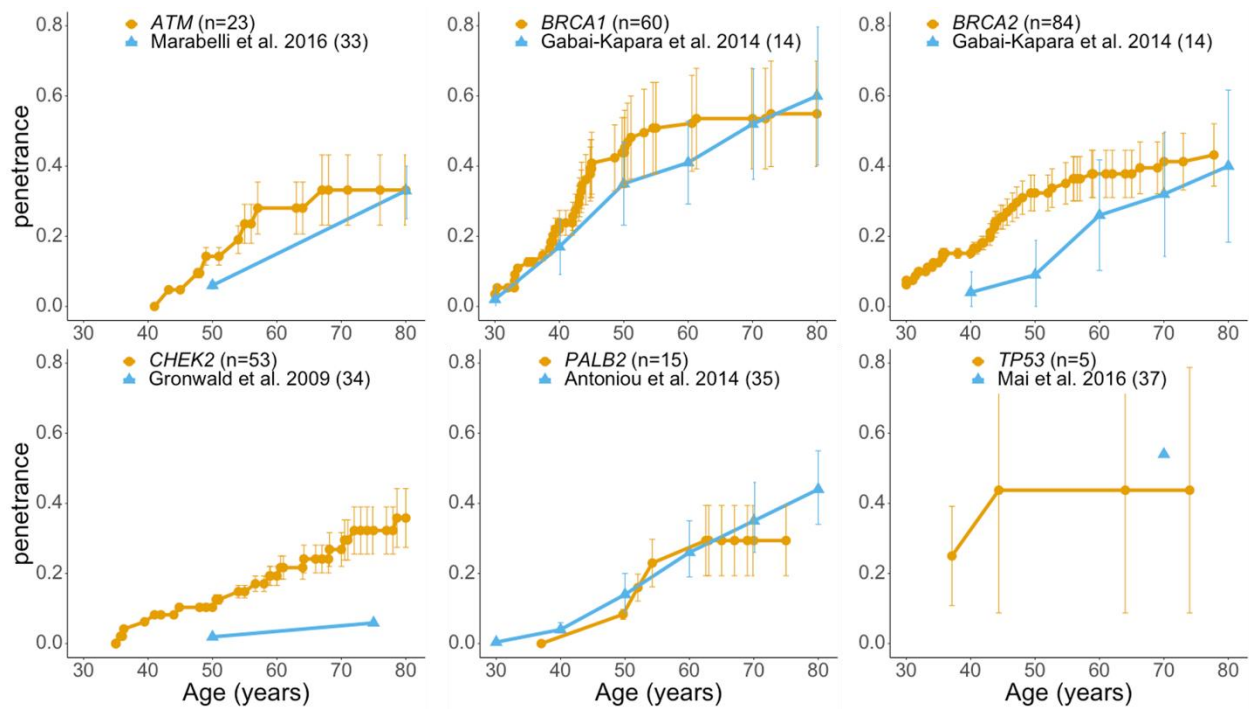

**Supplementary Figure 2. Penetrance (orange) of six breast cancer genes compared with penetrance (blue) in the literature from Table 2.** The sample size of the entire eMERGE III including those who were aware of their breast cancer genetic results prior to enrollment in eMERGE. Error bars indicate 95% confidence intervals (CI). CI of penetrance for *CHEK2* and *TP53* are not available from the literatures. Genes are sorted alphabetically.



## References:

1. Bogdanova, N., et al., *Association of two mutations in the CHEK2 gene with breast cancer*. Int J Cancer, 2005. **116**(2): p. 263-6.
2. Dufault, M.R., et al., *Limited relevance of the CHEK2 gene in hereditary breast cancer*. Int J Cancer, 2004. **110**(3): p. 320-5.
3. Szymanska-Pasternak, J., et al., *CHEK2 variants predispose to benign, borderline and low-grade invasive ovarian tumors*. Gynecol Oncol, 2006. **102**(3): p. 429-31.
4. Kleibl, Z., et al., *The CHEK2 c.1100delC germline mutation rarely contributes to breast cancer development in the Czech Republic*. Breast Cancer Res Treat, 2005. **90**(2): p. 165-7.
5. Muranen, T.A., et al., *Genetic modifiers of CHEK2\*1100delC-associated breast cancer risk*. Genet Med, 2017. **19**(5): p. 599-603.
6. Marabelli, M., S.C. Cheng, and G. Parmigiani, *Penetrance of ATM Gene Mutations in Breast Cancer: A Meta-Analysis of Different Measures of Risk*. Genet Epidemiol, 2016. **40**(5): p. 425-31.
7. Gabai-Kapara, E., et al., *Population-based screening for breast and ovarian cancer risk due to BRCA1 and BRCA2*. Proc Natl Acad Sci U S A, 2014. **111**(39): p. 14205-10.
8. Gronwald, J., et al., *Cancer risks in first-degree relatives of CHEK2 mutation carriers: effects of mutation type and cancer site in proband*. Br J Cancer, 2009. **100**(9): p. 1508-12.
9. Antoniou, A.C., et al., *Breast-cancer risk in families with mutations in PALB2*. N Engl J Med, 2014. **371**(6): p. 497-506.
10. Han, M.R., et al., *Evaluating genetic variants associated with breast cancer risk in high and moderate-penetrance genes in Asians*. Carcinogenesis, 2017. **38**(5): p. 511-518.
11. Mai, P.L., et al., *Risks of first and subsequent cancers among TP53 mutation carriers in the National Cancer Institute Li-Fraumeni syndrome cohort*. Cancer, 2016. **122**(23): p. 3673-3681.
